# Supplementary material for: Impact of Arthroscopic Experience on the Learning Curve in Interlaminar Endoscopic Lumbar Discectomy: A Single-Center Prospective Cohort Study of 240 Patients
Source: Research Square preprint supplement (doi:10.21203/rs.3.rs-8099529/v1), 2025-11-19
Supplement: Supplementary file 1 [file 46f113720d2879bc4d4a8a82.docx]

**Supplementary Material**

**STROBE Checklist – Strengthening the Reporting of Observational Studies in Epidemiology**
**Manuscript Title:** Does Arthroscopic Experience Shorten the Learning Curve in Interlaminar Endoscopic Lumbar Discectomy? A Single-Center Prospective Cohort Study of 240 Patients
**Journal:** *European Spine Journal*

| | **Section / Item** | **Recommendation** | **Location in Manuscript** | | --- | --- | --- | | **Title and abstract** | Indicate study design in title or abstract; provide balanced summary of what was done and found. | Title page; Abstract (lines 1–20) | | **Introduction** |  |  | | Background / rationale | Explain scientific background and rationale for the study. | Introduction (p. 2–3) | | Objectives | State specific objectives and hypotheses. | Introduction, “Objective” and “Hypothesis” subsections | | **Methods** |  |  | | Study design | Present key elements of study design early in the paper. | Methods, “Study Design” (p. 3) | | Setting | Describe setting, locations, and relevant dates, including periods of recruitment and follow-up. | Methods, “Patient Population” (p. 3–4) | | Participants | Give eligibility criteria, and sources/methods of selection. | Methods, “Inclusion and Exclusion Criteria” (p. 4) | | Variables | Clearly define outcomes, exposures, predictors, potential confounders. | Methods, “Outcome Measures” (p. 5–6) | | Data sources / measurement | Give sources of data and methods of assessment (measurement). | Methods, “Data Collection and Follow-up” (p. 5) | | Bias | Describe efforts to address potential sources of bias. | Methods, “Study Design” and “Surgeon Characteristics and Training” (p. 3–4) | | Study size | Explain how study size was determined. | Methods, “Sample Size and Statistical Analysis” (p. 6) | | Quantitative variables | Explain how quantitative variables were handled in the analyses. | Methods, “Statistical Analysis” (p. 6) | | Statistical methods | Describe all statistical methods, including subgroup analyses. | Methods, “Statistical Analysis” (p. 6) | | **Results** |  |  | | Participants | Report numbers at each stage (eligible, included, analyzed). | Results 3.4 and 3.9 (p. 7–9) | | Descriptive data | Give characteristics of study participants. | Results 3.4 Baseline Characteristics, Table 1 | | Outcome data | Report numbers of outcome events or summary measures. | Results 3.7–3.9, Tables 2–5 | | Main results | Provide unadjusted and adjusted estimates, with precision (e.g. 95% CI). | Results 3.5–3.8; Tables 2–4 | | Other analyses | Report subgroup and sensitivity analyses. | Results 3.5–3.6 (learning curve and CUSUM) | | **Discussion** |  |  | | Key results | Summarize key results with reference to study objectives. | Discussion, section 4 (p. 12–13) | | Limitations | Discuss limitations of the study, taking into account sources of potential bias. | Discussion, section 4.5 (p. 14) | | Interpretation | Give a cautious overall interpretation of results. | Discussion 4.6 (p. 15) | | Generalizability | Discuss the generalizability (external validity) of the study results. | Discussion 4.5–4.6 (p. 15–17) | | **Other information** |  |  | | Funding | Give source of funding and role of funders. | “Funding” section (p. 18) | | Ethical approval | Indicate ethics approval and informed consent. | “Ethics Statement” (p. 17) | | Data availability | Provide data availability statement. | “Data Availability Statement” (p. 18) | | Conflicts of interest | State any potential conflicts. | “Conflict of Interest” (p. 18) | |  |  |
| --- | --- | --- | --- | --- | --- | --- | --- | --- | --- | --- | --- | --- | --- | --- | --- | --- | --- | --- | --- | --- | --- | --- | --- | --- | --- | --- | --- | --- | --- | --- | --- | --- | --- | --- | --- | --- | --- | --- | --- | --- | --- | --- | --- | --- | --- | --- | --- | --- | --- | --- | --- | --- | --- | --- | --- | --- | --- | --- | --- | --- | --- | --- | --- | --- | --- | --- | --- | --- | --- | --- | --- | --- | --- | --- | --- | --- | --- | --- | --- | --- | --- | --- | --- | --- | --- | --- | --- | --- | --- | --- | --- | --- | --- | --- | --- |
|  |  |  |
|  |  |  |
|  |  |  |
|  |  |  |
|  |  |  |
|  |  |  |
|  |  |  |
|  |  |  |
|  |  |  |
|  |  |  |
|  |  |  |
|  |  |  |

**Note:**
Page references correspond to the final version of the manuscript (pages 2–18).
All checklist items are addressed within the indicated sections.
